# Supplementary material for: CdS QDs grown on ellipsoidal BiVO4 for efficient photocatalytic degradation of tetracycline
Source: Royal Society of Chemistry journal article supplement (doi:10.1039/d4dt00586d), 2024-01-01
Supplement: d4dt00586d1.pdf [file d4dt00586d1.pdf]

## Supporting information

### **CdS QDs growing on ellipsoidal BiVO<sub>4</sub> for efficient photocatalytic degradation of tetracycline**

Kai Liu<sup>a</sup>, Mao-Jin Ran<sup>a,b</sup>, Zhi-Rong Li<sup>a,b</sup>, Yi-Fu Huang<sup>a</sup>, Ze-Yu Jiang<sup>a</sup>, Wan-Ying Li<sup>a</sup>, Shokir Khojiev<sup>a,c</sup>, Zhi-Yi Hu<sup>a,b</sup>, Li-Hua Chen<sup>a\*</sup>, Jing Liu, Yu Li<sup>a\*</sup>, Bao-Lian Su<sup>a,d\*</sup>

<sup>a</sup> State Key Laboratory of Advanced Technology for Materials Synthesis and Processing, Wuhan University of Technology, 122 Luoshi Road, 430070 Wuhan, Hubei, China

<sup>b</sup> Nanostructure Research Centre (NRC), Wuhan University of Technology, 122 Luoshi Road, 430070 Wuhan, Hubei, China

<sup>c</sup> Center for Advanced Technology under Agency for Innovative Development of the Republic of Uzbekistan, The Ministry of Higher Education, Science and Innovation, University street, 3A, 100174 Tashkent, Uzbekistan

<sup>d</sup> Laboratory of Inorganic Materials Chemistry (CMI), University of Namur, 61 rue de Bruxelles, B-5000 Namur, Belgium

\* Corresponding authors. Email: [yu.li@whut.edu.cn](mailto:yu.li@whut.edu.cn), [chenlihua@whut.edu.cn](mailto:chenlihua@whut.edu.cn) and [bao-lian.su@unamur.be](mailto:bao-lian.su@unamur.be)

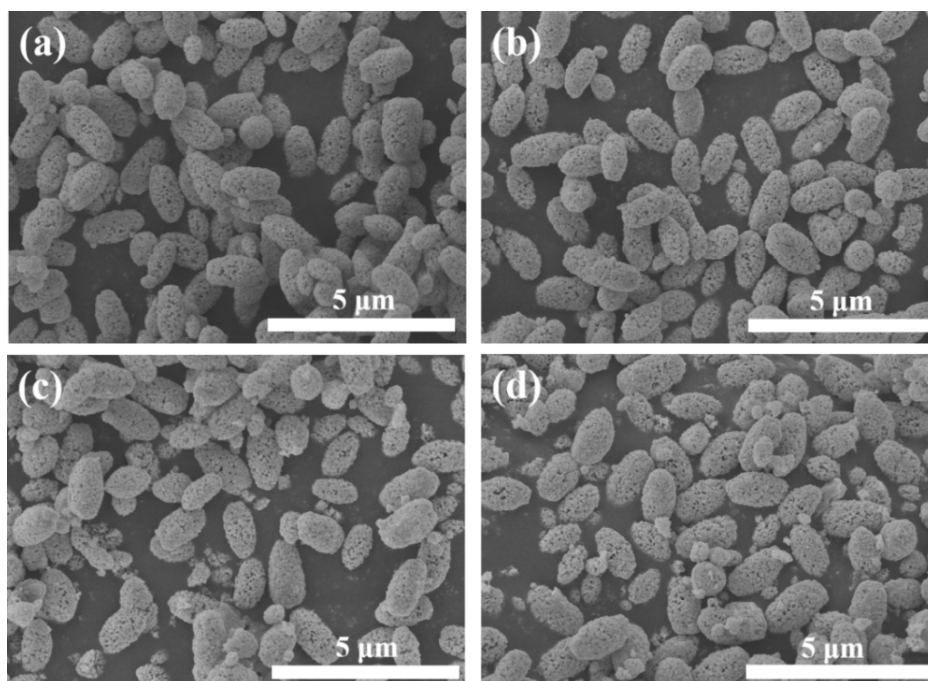

**Fig. S1.** SEM images of (a) BVO@CdS-0.02, (b) BVO@CdS-0.05, (c) BVO@CdS-0.07 and (d) BVO@CdS-0.1.

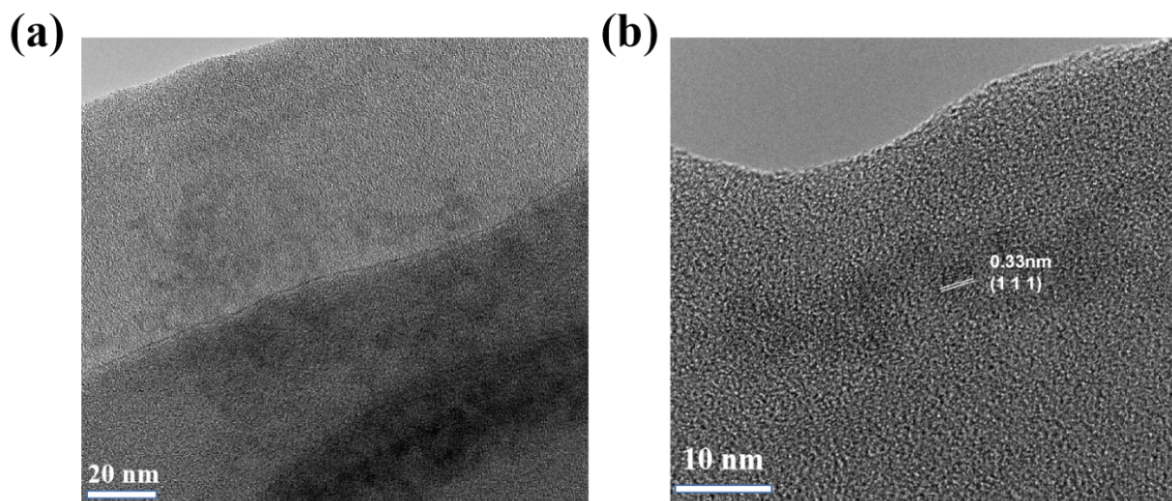

**Fig. S2.** HAADF-STEM images of CdS QDs.

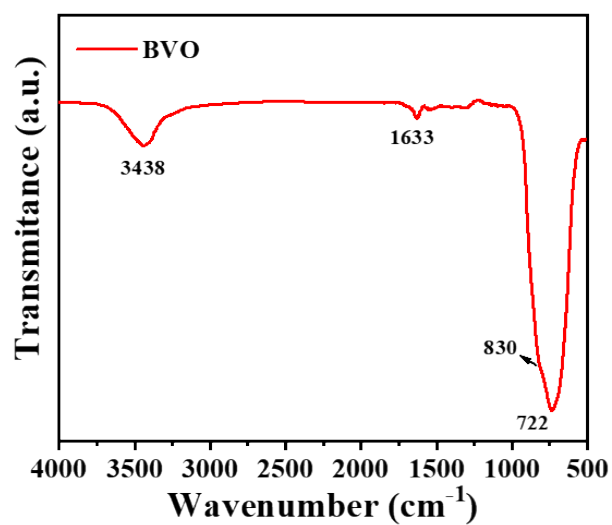

Fig. S3. FTIR spectrum of BVO.

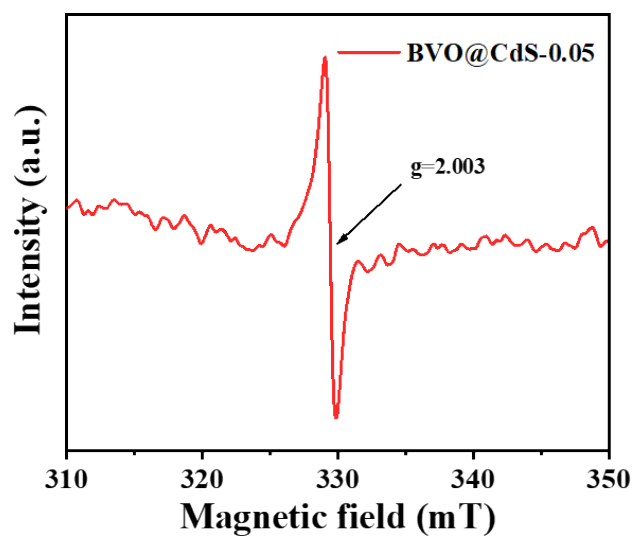

Fig. S4. ESR signal of BVO.

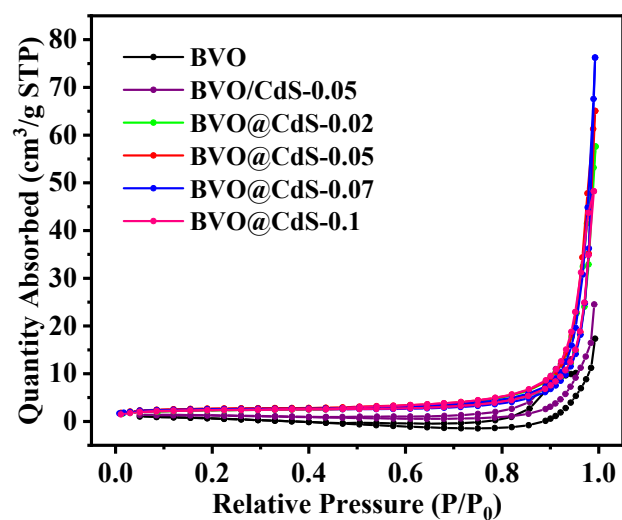

**Fig. S5.** Nitrogen adsorption desorption curves of BVO, BVO/CdS-0.05 and BVO@CdS-X.

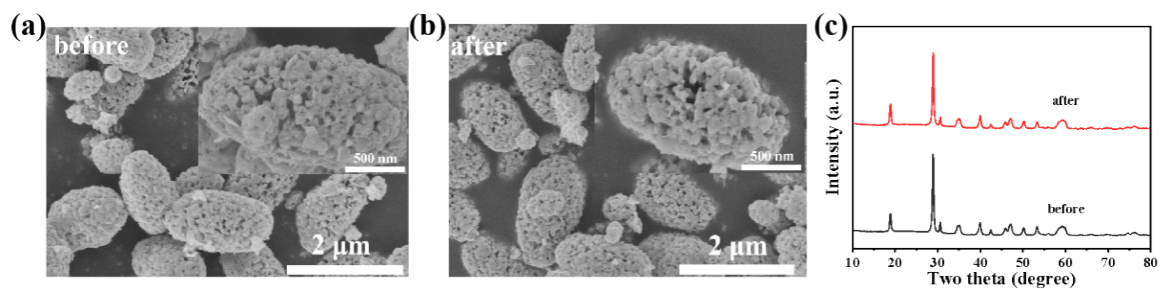

**Fig. S6.** SEM (a, b) and (c) XRD test patterns of BVO@CdS-0.05 material before degradation and after four TC photodegradation cycles.

**Table S1.** ICP test of the BVO@CdS-0.05 sample.

| Sample       | Bi<br>mass ratio (%) | V<br>mass ratio (%) | Cd<br>mass ratio (%) | S<br>mass ratio (%) | Cd/Bi<br>atomic ratio |
|--------------|----------------------|---------------------|----------------------|---------------------|-----------------------|
| BVO@CdS-0.05 | 54.7                 | 14.2                | 0.78                 | 0.28                | 1:37.7                |

**Table S2.** Specific surface area and mean pore size values of BVO, BVO/CdS-0.05 and BVO@CdS-X.

| Sample       | Specific surface area<br>(m <sup>2</sup> /g) | Mean pore size values<br>(nm) |
|--------------|----------------------------------------------|-------------------------------|
| BVO          | 0.928                                        | 33.2                          |
| BVO/CdS-0.05 | 3.260                                        | 16.6                          |
| BVO@CdS-0.02 | 7.472                                        | 12.1                          |
| BVO@CdS-0.05 | 7.803                                        | 10.7                          |
| BVO@CdS-0.07 | 8.287                                        | 10.8                          |
| BVO@CdS-0.1  | 7.373                                        | 11.9                          |

**Tab. S3.** Summary of other reported photocatalysts for the degradation of TC

| Photocatalysis                                         | Amount<br>(g) | Concentration (20mg/L)<br>and volume (mL) of<br>tetracycline solution | Time<br>(min) | Removal<br>efficiency | Refs.            |
|--------------------------------------------------------|---------------|-----------------------------------------------------------------------|---------------|-----------------------|------------------|
| <b>BVO@CdS-0.05</b>                                    | <b>0.03</b>   | <b>20/100</b>                                                         | <b>30</b>     | <b>88%</b>            | <b>This work</b> |
| Ag@g-C <sub>3</sub> N <sub>4</sub> @BiVO <sub>4</sub>  | 0.03          | 20/100                                                                | 60            | 82.75%                | [1]              |
| 4BN-4                                                  | 0.02          | 30/50                                                                 | 120           | 87.1%                 | [2]              |
| N-GNDs/Ag/BiVO <sub>4</sub>                            | 0.05          | 20/100                                                                | 80            | 85.4%                 | [3]              |
| Fe <sub>3</sub> O <sub>4</sub> /BiVO <sub>4</sub> /CdS | 0.1           | 10/100                                                                | 90            | 87.37%                | [4]              |
| BiVO <sub>4</sub> /rGH                                 | 0.05          | 20/100                                                                | 120           | 73.2%                 | [5]              |
| α-Fe <sub>2</sub> O <sub>3</sub> /BiVO <sub>4</sub>    | 0.05          | 20/100                                                                | 120           | 75.8%                 | [6]              |

**Table S4.** Fluorescence lifetime parameters of the samples.

| Sample            | $\tau_1$<br>(ns) | $A_1$<br>(%) | $\tau_2$<br>(ns) | $A_2$<br>(%) | $\tau_{\text{average}}$<br>(ns) |
|-------------------|------------------|--------------|------------------|--------------|---------------------------------|
| BiVO <sub>4</sub> | 0.18             | 90.61        | 3.32             | 9.93         | 0.475                           |
| BVO@CdS-0.05      | 0.2              | 85.14        | 3.25             | 14.86        | 0.635                           |

**Table S5.** The structural information of the possible intermediate products.

| Compounds | Formula                                                       | m/z | Proposed structure                                                                    |
|-----------|---------------------------------------------------------------|-----|---------------------------------------------------------------------------------------|
| TC        | C <sub>22</sub> H <sub>24</sub> N <sub>2</sub> O <sub>8</sub> | 445 | 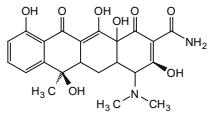   |
| P1        | C <sub>22</sub> H <sub>26</sub> N <sub>2</sub> O <sub>9</sub> | 461 |    |
| P2        | C <sub>20</sub> H <sub>20</sub> N <sub>2</sub> O <sub>9</sub> | 433 |   |
| P3        | C <sub>21</sub> H <sub>22</sub> N <sub>2</sub> O <sub>8</sub> | 432 |  |
| P4        | C <sub>19</sub> H <sub>19</sub> NO <sub>8</sub>               | 388 |  |
| P5        | C <sub>12</sub> H <sub>17</sub> NO <sub>4</sub>               | 243 |  |
| P6        | C <sub>13</sub> H <sub>14</sub> O <sub>4</sub>                | 235 |  |
| P7        | C <sub>10</sub> H <sub>10</sub> O <sub>2</sub>                | 163 |  |

## References

- [1] F. Chen, Q. Yang, Y. Wang, J. Zhao, D. Wang, X. Li, Z. Guo, H. Wang, Y. Deng, C. Niu, G. Zeng, *Appl. Catal. B: Environ.*, 2017, **205** 133-147.
- [2] W. Xu, Q. Zhang, K. Xu, L. Qiu, J. Song, L. Wang, *Chemosphere*, 2022, **307** 135811.
- [3] C. Ma, S.T.U. Din, W.C. Seo, J. Lee, Y. Kim, H. Jung, W. Yang, *Sep. Purif. Technol.*, 2021, **264** 118423.
- [4] G. Xu, M. Du, T. Li, Y. Guan, C. Guo, *Sep. Purif. Technol.*, 2021, **275**,119157.
- [5] C. Ma, W.C. Seo, J. Lee, Y. Kim, H. Jung, W. Yang, *Chemosphere*, 2021, **275**, 130052.
- [6] C. Ma, J. Lee, Y. Kim, W. Cheol Seo, H. Jung, W. Yang, *J. Colloid Interface Sci.*, 2021, **581**, 514-522.
